# Supplementary material for: Enhanced adsorption performance for aromatic sulfur compounds over a hierarchical structured AgX zeolite
Source: Royal Society of Chemistry journal article supplement (doi:10.1039/d1ea00060h), 2021-01-01
Supplement: d1ea00060h1.pdf [file d1ea00060h1.pdf]

## Supporting information

### **Enhanced adsorption performance for aromatic sulfur compounds over hierarchical structure AgX zeolite**

Kunhong Jiang,<sup>a</sup> Zhenyu Li,<sup>a,b</sup> Zexuan Zheng,<sup>c</sup> Jiefei Li,<sup>a</sup> Xingyue Qi,<sup>a</sup> Jian Zhou,<sup>a</sup> Hang Wei,<sup>a</sup> Yalin He,<sup>a</sup> Mei Xue<sup>\*a</sup> and Haibin Chu<sup>\*a</sup>

**Table S1.** Textural properties of parent NaX zeolite and NaX-CA(3.0) adsorbent.

| Adsorbents  | Surface area (m <sup>2</sup> /g) |            | Pore volume (cm <sup>3</sup> /g) |            | Pore width (nm) |            |               |
|-------------|----------------------------------|------------|----------------------------------|------------|-----------------|------------|---------------|
|             | Micro-pores                      | Meso-pores | Micro-pores                      | Meso-pores | Micro-pores     | Meso-pores | Average-pores |
| NaX         | 745.89                           | 34.01      | 0.279                            | 0.035      | 0.66            | --         | 1.67          |
| NaX-CA(3.0) | 852.13                           | 43.06      | 0.319                            | 0.045      | 0.66            | 3.9        | 1.78          |

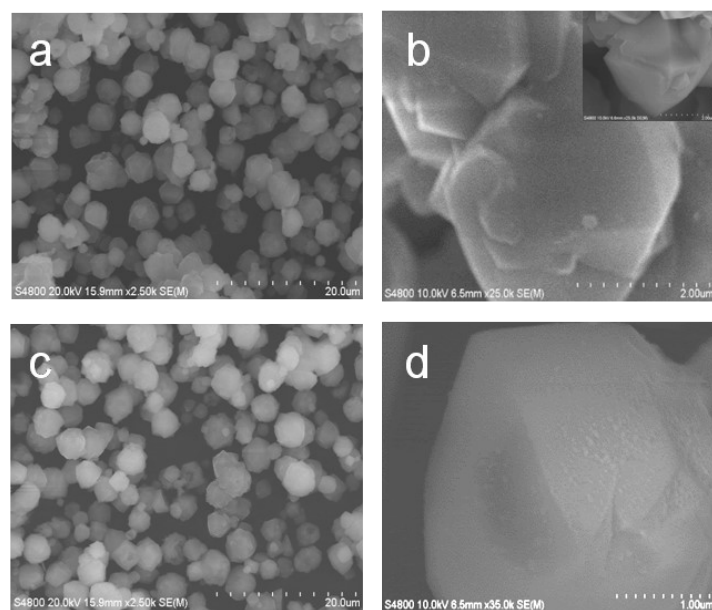

**Fig. S1** SEM images of original NaX (a, b) and NaX-CA(3.0) zeolite (c, d) adsorbents.

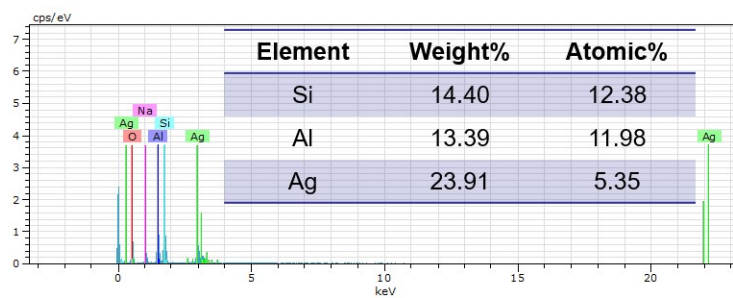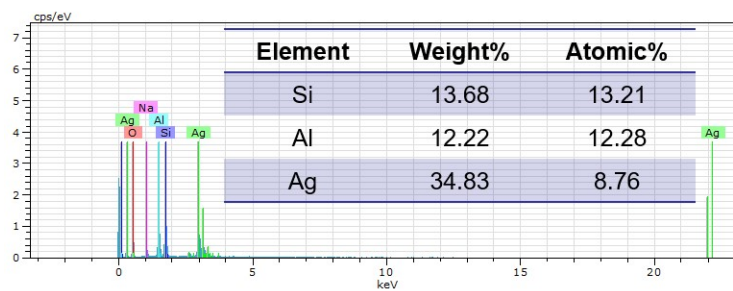

**Fig. S2** EDS analysis of AgX and AgX-CA(3.0).

**Table S2.** H<sub>2</sub>-TPR results of the adsorbents.

| <b>Sample</b>      | <b>Temp.(°C)</b> | <b>Peak quantity(mmol/g)</b> | <b>The total peak quantity(mmol/g)</b> |
|--------------------|------------------|------------------------------|----------------------------------------|
| <b>AgX</b>         | 120              | 3.08                         | 13.07                                  |
|                    | 221              | 2.16                         |                                        |
|                    | 309              | 2.48                         |                                        |
|                    | 412              | 5.35                         |                                        |
| <b>AgX-CA(1.5)</b> | 123              | 2.78                         | 12.52                                  |
|                    | 225              | 2.12                         |                                        |
|                    | 295              | 2.67                         |                                        |
|                    | 407              | 4.95                         |                                        |
| <b>AgX-CA(2.0)</b> | 109              | 2.67                         | 13.21                                  |
|                    | 224              | 2.25                         |                                        |
|                    | 303              | 3.18                         |                                        |
|                    | 405              | 5.11                         |                                        |
| <b>AgX-CA(3.0)</b> | 84               | 3.29                         | 17.40                                  |
|                    | 200              | 1.91                         |                                        |
|                    | 279              | 3.43                         |                                        |
|                    | 400              | 8.77                         |                                        |

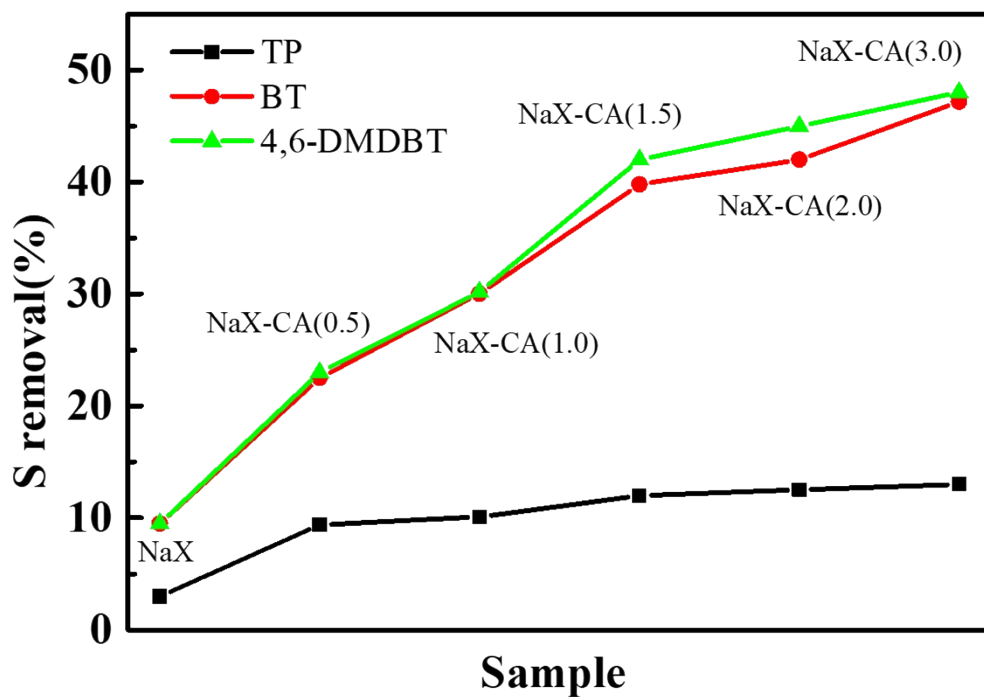

**Fig. S3** The sulfur removal over NaX and NaX-CA(M) from model gasoline. Experimental conditions : Initial sulfur concentration was 20 ppm, Vol. (model gasoline) = 10 mL,  $W_t$  (adsorbent) = 0.1 g, temperature: 80°C, contact time: 2 h.

**Table S3.** Adsorption kinetic parameters obtained at different temperatures by non-linear fitting.

| <i>Temp. (°C)</i> | Pseudo-first-order Model       |                                        |                                |                      | Pseudo-second-order Model     |                                |                      |
|-------------------|--------------------------------|----------------------------------------|--------------------------------|----------------------|-------------------------------|--------------------------------|----------------------|
|                   | <i>q<sub>e</sub> exp(mg/g)</i> | <i>K<sub>1</sub>(min<sup>-1</sup>)</i> | <i>q<sub>e</sub> cal(mg/g)</i> | <i>R<sup>2</sup></i> | <i>K<sub>2</sub>(g/g min)</i> | <i>q<sub>e</sub> cal(mg/g)</i> | <i>R<sup>2</sup></i> |
| 80                | 1.941                          | 0.245                                  | 1.959                          | 0.898                | 0.204                         | 1.967                          | 0.998                |
| 50                | 1.456                          | 0.126                                  | 1.256                          | 0.892                | 0.157                         | 1.513                          | 0.997                |
| 30                | 0.131                          | 0.114                                  | 0.104                          | 0.878                | 0.054                         | 0.125                          | 0.990                |

**Table S4.** Langmuir and Freundlich isotherm parameters for sulfur compounds adsorption on AgX-CA(3.0) adsorbent.

|           | Langmuir Model |                           |       | Freundlich Model |       |       |
|-----------|----------------|---------------------------|-------|------------------|-------|-------|
|           | $K_L$          | $q_m, (\text{mg g}^{-1})$ | $R^2$ | $n$              | $K_F$ | $R^2$ |
| Simple    |                |                           |       |                  |       |       |
| BT        | 9.39           | 2.32                      | 1     | 1.83             | 2.06  | 0.701 |
| 4,6-DMDBT | 2.34           | 4.81                      | 0.993 | 5.39             | 3.12  | 0.727 |

**Table S5.** The comparison of adsorption desulfurization performance of AgX-CA(3.0) with some representative Zeolite-based adsorbents.



| Adsorbents                     | Sulfur concentration<br>(PPM S) | Model solvent/aromatics | Sulfur removal (%) | Capacity<br>(mg S per g) | Breakthrough<br>(mL g <sup>-1</sup> ) | Ref       |
|--------------------------------|---------------------------------|-------------------------|--------------------|--------------------------|---------------------------------------|-----------|
| AgX-CA(3.0)                    | 10(BT)                          | n-Heptane               | 85.5               | —                        | —                                     | This work |
| AgX-CA(3.0)                    | 10(DMDBT)                       | n-Heptane               | 99.1               | —                        | —                                     | This work |
| CeY                            | 50(TP)                          | n-Octane                | —                  | —                        | 14.0                                  | [1]       |
| CeY                            | 5(TP)                           | n-Heptane               | 80.0               | 1.2                      | —                                     | [2]       |
| Meso-Y                         | 100(DBT)                        | n-Octane                | —                  | —                        | 17.0                                  | [3]       |
| Meso-CuCeY                     | 100(DBT)                        | n-Octane                | —                  | —                        | 45.0                                  | [3]       |
| NaY                            | 100(TP)                         | Cyclohexane             | 69.0               | 1.3                      | —                                     | [4]       |
| CeY                            | 128(TP)                         | Cyclohexane             | 97.1               | 1.9                      | —                                     | [4]       |
| NaY                            | 217(TP)                         | Benzene                 | —                  | 0.1                      | —                                     | [5]       |
| HY                             | 217(TP)                         | Benzene                 | —                  | 0.1                      | —                                     | [5]       |
| NiY                            | 217(TP)                         | Cyclohexane             | —                  | 3.1                      | —                                     | [6]       |
| CeY                            | 217(TP)                         | Cyclohexane             | —                  | 2.4                      | —                                     | [6]       |
| CuCeY                          | 142(TP)                         | n-Octane                | —                  | —                        | 36.0                                  | [7]       |
| CuCeY                          | 142(BT)                         | n-Octane                | —                  | —                        | 195.0                                 | [7]       |
| Cu(II) CeY                     | 142(TP)                         | n-Octane                | —                  | —                        | 20.0                                  | [8]       |
| AgY                            | 142(TP)                         | n-Octane                | —                  | —                        | 75.0                                  | [9]       |
| AgCeY                          | 142(TP)                         | n-Octane                | —                  | —                        | 25.0                                  | [9]       |
| CeY                            | 142(TP)                         | Cyclohexane             | —                  | 2.3                      | —                                     | [10]      |
| AgCeY                          | 142(TP)                         | n-Octane                | —                  | —                        | 30.0                                  | [11]      |
| (Si/Al = 4.8)                  |                                 |                         |                    |                          |                                       |           |
| CuBTC                          | 250(BT)                         | n-octane                | —                  | —                        | 50.0                                  | [12]      |
| CuBTC                          | 250(DBT)                        | n-octane                | —                  | —                        | 45.0                                  | [12]      |
| Cu <sub>2</sub> O@HP-<br>CuBTC | 250(BT)                         | n-octane                | —                  | —                        | 65.0                                  | [12]      |
| Cu <sub>2</sub> O@HP-          | 250(DBT)                        | n-octane                | —                  | —                        | 70.0                                  | [12]      |

|                                        |          |          |      |      |   |      |
|----------------------------------------|----------|----------|------|------|---|------|
| CuBTC                                  |          |          |      |      |   |      |
| Meso-                                  | 200(DBT) | n-octane | 97.1 | —    | — | [13] |
| ZnO/TiO <sub>2</sub> -SiO <sub>2</sub> |          |          |      |      |   |      |
| CN-x                                   | 200(DBT) | toluene  | —    | 37.0 | — | [14] |

## Reference

1. K. X. Lee and J. A. Valla, *Appl. Catal B.*, 2017, **201**, 359–369.
2. M. Xue, R. Chitrakar, K. Sakane, T. Hirotsu, K. Ooi, Y. Yoshimura, Q. Feng and N. Sumida, *J.*

*Colloid Interface Sci.*, 2005, **285**, 487–492.

3. K. X. Lee, G. Tsilomelekis and J. A. Valla, *Appl. Catal B.*, 2018, **234**, 130–142.
4. Y. Shi, X. Yang, F. Tian, C. Jia and Y. Chen, *J. Nat. Gas Chem.*, 2012, **21**, 421–425.
5. J. Liao, Y. Zhang, L. Fan, L. Chang and W. Bao, *Ind. Eng. Chem. Res.*, 2019, **58**, 4572–4580.
6. X. Guo, L. Bao, L. Chang, W. Bao and J. Liao, *Environ. Sci. Pollut. Res.*, 2019, **26**, 13138–13146.
7. H. Song, H. Song, X. Wan, M. Dai, J. Zhang and F. Li, *Fuel Process. Technol.*, 2013, **116**, 52–62.
8. H. Song, Y. Chang and H. Song, *Adsorption.*, 2016, **22**, 139–150.
9. H. Song, X. Cui, H. Song, H. Gao and F. Li, *Ind. Eng. Chem. Res.*, 2014, **53**, 14552–14557.
10. F. Tian, Q. Shen, Z. Fu, Y. Wu and C. Jia, *Fuel Process. Technol.*, 2014, **128**, 176–182.
11. H. Song, H. Gao, H. Song, G. Yang and X. Li, *Ind. Eng. Chem. Res.*, 2016, **55**, 3813–3822.
12. T. Feng, Y. Wang, Y. Wu, and F.T. Li *J. Mater. Chem. A.*, 2020, **8**, 8678–8683.
13. K. Zhou, Y. Ding, L. Zhang, H. Wu. and J. Guo. *Dalton Trans.*, 2020, **49**, 1600.
14. C. Deng and M. Zhu., *Energy Fuel.*, 2020, **34**, 9320–9327.
